1 **Effect of light and darkness on the growth and development of downy**  
2 **mildew pathogen *Hyaloperonospora arabidopsidis*.**

3

4 Osman Telli<sup>1</sup>, Catherine Jimenez-Quiros<sup>1</sup>, John M. McDowell<sup>2</sup> and Mahmut Tör<sup>1\*</sup>

5

6 1- School of Science and the Environment, University of Worcester, Henwick Grove,  
7 Worcester, WR2 6AJ, UK.

8 2- School of Plant and Environmental Sciences, Virginia Tech, Blacksburg, VA,  
9 24061-0329, U.S.A.

10

11

12

13 \* Corresponding author, Mahmut Tör ([m.tor@worc.ac.uk](mailto:m.tor@worc.ac.uk))

14 **Running title:** Effect of light on Arabidopsis downy mildew disease

15

16

17

18

19

20

21

22

23

24

25

26

## 1 **Summary**

2 Disease development in plants requires a susceptible host, a virulent pathogen, and a  
3 favourable environment. Oomycete pathogens cause many important diseases and  
4 have evolved sophisticated molecular mechanisms to manipulate their hosts. Day  
5 length has been shown to impact plant-oomycete interactions but a need exists for a  
6 tractable reference system to understand the mechanistic interplay between light  
7 regulation, oomycete pathogen virulence, and plant host immunity. Here we present  
8 data demonstrating that light is a critical factor in the interaction between *Arabidopsis*  
9 *thaliana* and its naturally occurring downy mildew pathogen *Hyaloperonospora*  
10 *arabidopsidis* (*Hpa*). We investigated the role of light on spore germination, mycelium  
11 development, sporulation and oospore formation of *Hpa*, along with defence  
12 responses in the host. We observed abundant *Hpa* sporulation on compatible  
13 *Arabidopsis* under day lengths ranging from 10 to 14 hours. Contrastingly, exposure  
14 to constant light or constant dark suppressed sporulation. Exposure to constant dark  
15 suppressed spore germination, mycelial development and oospore formation.  
16 Interestingly, exposure to constant light stimulated spore germination, mycelial  
17 development and oospore formation. A biomarker of plant immune system activation  
18 was induced under both constant light and constant dark. Altogether, these findings  
19 demonstrate that *Hpa* has the molecular mechanisms to perceive and respond to light  
20 and that both the host and pathogen responses are influenced by the light regime.  
21 Therefore, this pathosystem can be used for investigations to understand the  
22 molecular mechanisms through which oomycete pathogens like *Hpa* perceive and  
23 integrate light signals, and how light influences pathogen virulence and host immunity  
24 during their interactions.

25

26 **Keywords:** *Arabidopsis*, downy mildew, oomycetes, light regime, circadian rhythm

## 1 Introduction

2 Environmental factors such as light, temperature and humidity play a significant role in  
3 the infection of plants by microbial pathogens and during disease development (Cheng  
4 et al., 2019). At the molecular level, adaptation to the environmental fluctuations is  
5 influenced by circadian timing mechanisms that undergo daily adjustment and act as a  
6 seasonal timer for diverse organisms, including plants and plant-associated microbes  
7 (Johnson et al., 2003). Light is the one of most significant environmental signals for  
8 circadian regulation (Dunlap et al., 2004). Many organisms have circadian regulation  
9 networks that operate through similar mechanisms. For plants, light is perceived by  
10 photoreceptors and act as a signal to regulate circadian genes (Millar, 2004; Franklin  
11 et al., 2005). Discrete light at different times of the day have been reported to have  
12 defined and particular effects on phase changes (Johnson et al., 2003). The circadian  
13 clock has also been shown to have a major effect on regulation of plant immunity  
14 (Karapetyan and Dong, 2018; Lu et al., 2017)

15 Light is known to have an effect on sporulation of several fungal and oomycete  
16 species, and the circadian clock of one fungal phytopathogen has been linked to the  
17 pathogen's virulence programme (Hevia et al., 2015). Contrastingly, there are limited  
18 number of publications on the relation of light with development or virulence in  
19 oomycetes (Rumbolz et al., 2002). Early studies reported positive phototaxis of  
20 *Phytophthora cambivora* zoospores (Carlile, 1970) and the effect of humidity and light  
21 on discharge of sporangia of different oomycete pathogens (Fried and Stuteville, 1977;  
22 Leach et al., 1982; Su et al., 2000). Similarly, in *Plasmopara viticola*, the downy mildew  
23 pathogen of grapevine, continuous light did not have any effect on the growth of the  
24 mycelium and formation of sporangiophores, but the shape of sporangia was observed  
25 to be immature (Rumbolz et al., 2002). In the lettuce downy mildew pathogen *Bremia*

1 *lactucae*, exposure to dark induced sporulation while light inhibited sporulation in a  
2 temperature-dependent manner: At low temperature, light was suppressive, however,  
3 with increasing temperature, the effect of suppression was decreased (Nordskog et al.,  
4 2007). Light was also suppressive of sporulation in *Peronospora belbahrii*, downy  
5 mildew of sweet basil, but light-dependent suppression of sporulation was enhanced  
6 at higher temperature. Light is also known to regulate the balance between asexual and  
7 sexual spore formation in *Phytophthora infestans*, causative agent of potato blight  
8 (Xiang and Judelson, 2014), in which exposure to constant light suppressed sporulation  
9 on plants and artificial media (Harnish, 1965). The mechanistic basis of light effects  
10 on oomycete virulence are largely unknown and likely to comprise a combination of  
11 light-regulated programmes for the host as well as the pathogen. It is also conceivable  
12 that the interacting organisms could directly influence each other's circadian  
13 programs.

14 Oomycetes cause many important diseases of crops and in natural ecosystems  
15 (Kamoun et al., 2015). Much recent progress has been made in understanding plant-  
16 oomycete interactions through the development of reference plant-oomycete  
17 pathosystems that are amenable to genomic, genetic, and molecular approaches  
18 (Herlihy et al., 2019). One such pathosystem is comprised of the downy mildew  
19 pathogen *Hyaloperonospora arabidopsidis* (*Hpa*) and its natural host *Arabidopsis*  
20 *thaliana* (Coates and Beynon, 2010). Like many oomycetes, *Hpa* establishes an  
21 intimate relationship with its host by forming structures called haustoria, which are  
22 used to obtain nutrients from the plant. The *Hpa* life cycle is completed by the  
23 formation of aerial sporangiophores, which produce asexual spores, and by sexual  
24 oospores that are formed in infected leaves (Koch and Slusarenko, 1990). Because  
25 *Hpa* is an obligate biotroph, it requires its host to remain alive in order to complete its  
26 life cycle (Coates and Beynon, 2010). *Hpa* also redirects the host's metabolism and



1 suppress the host defence mechanisms (Herlihy et al., 2019). In *Hpa-Arabidopsis*  
2 interactions, it has been established that 16°C is the best temperature for *Hpa*  
3 sporulation under laboratory conditions (Dangl et al., 1992). However, the effect of  
4 different light/dark regimes on the sporulation of *Hpa* and the most productive light/dark  
5 time period for *Hpa* growth have not been reported. Elucidating the effect of light on the  
6 sporulation and growth of *Hpa* may also give some clue on whether there is a circadian  
7 regulation of its life cycle. Here, we report the effect of different light/dark regimes on  
8 the germination, mycelial development and sporulation of *Hpa*.

9

## 10 **Results**

### 11 **Optimal light regime for *Hpa* sporulation**

12 We began by testing how *Hpa* sporulation is affected by three different light (L) /dark  
13 (D) periods, representing day lengths commonly encountered by the plant and  
14 pathogen in natural environments. We used a compatible interaction between the *Hpa*  
15 isolate Emoy2 and a mutant in the Arabidopsis accession Columbia (Col) that  
16 inactivates the disease resistance gene *RPP4* (*Recognition of Peronospora parasitica*  
17 *gene 4*, Roux et al., 2011). Sporulation was quantified at four- and seven-days post-  
18 inoculation (dpi) under the following light regimes: 14h L / 10h D, 12h L / 12h D and  
19 10h L / 14h D. Plants grown under all three regimes supported abundant sporulation,  
20 which increased between four and seven dpi (Figure 1). We observed only small,  
21 statistically insignificant differences in sporulation between the three regimes. We  
22 selected 12h L / 12h D as the reference time period for subsequent experiments.

23

### 24 **Exposure to constant light or dark suppresses sporulation of *Hpa***

25 The next set of experiments were designed to test how *Hpa* sporulation was affected  
26 by constant light or constant darkness. Four different light/dark conditions were

1 compared to the 12h L / 12 h D reference: (1) Constant light exposure beginning after  
2 3dpi; (2) constant dark exposure after 3dpi; (3) constant light exposure beginning  
3 immediately after inoculation; and (4) constant dark exposure beginning immediately  
4 after inoculation. As expected, abundant sporulation was observed between four and  
5 seven dpi on plants grown under the 12h L /12h D light regime (Figure 2A).  
6 Contrastingly, sporulation was dramatically reduced on seedlings exposed to constant  
7 light or dark after 3dpi. Moreover, sporulation was almost totally suppressed on plants  
8 grown under 7d constant light or 7d constant dark regime that commenced immediately  
9 after inoculation (Figure 2B). When infected seedlings were exposed to constant light  
10 or dark after 3dpi, there were hardly any new conidiophores and the amount of  
11 sporulation after 7dpi was the same as at 3dpi (Figure 2A). These experiments  
12 demonstrate that disruption of a normal light / dark regime can significantly affect the  
13 pathogen's capacity to complete the asexual phase of its life cycle.

14

### 15 **Recovery from suppression of sporulation by constant light**

16 We tested whether asexual sporulation could be restored by returning plants to the  
17 12h light/ 12h dark after treatment with constant light or dark as described above.  
18 Interestingly, seedlings that were returned to a normal 12h L / 12 D regime after  
19 exposure to seven days constant light supported light sporulation 2 days after the shift  
20 and moderate sporulation after 4 days (Figure 2C). A similar recovery was observed  
21 in seedlings returned to the reference regime after treatment with constant light from  
22 4-7 dpi (Figure 2C). Contrastingly, seedlings exposed to constant dark immediately  
23 after inoculation began to show a chlorotic phenotype after four days and the  
24 seedlings did not recover after shifting to normal light regime and no sporulation could  
25 be recorded (Figure 2C). Similarly, seedlings that were exposed to constant dark  
26 between 4dpi and 7dpi did not survive after 7dpi and thus no sporulation could be

1 recorded (Figure 2B). When seedlings were exposed to constant light or constant dark  
2 beginning immediately after inoculation for 3 days, then shifted to a normal light regime,  
3 light sporulation was recovered 7dpi in samples exposed to constant dark. Abundant  
4 sporulation was observed 7dpi in samples exposed to constant light, similar to plants  
5 grown under a normal light regime (Figure 2D). These experiments demonstrated that  
6 the suppression of sporulation by constant light treatment of varying durations was not  
7 a permanent effect and that sporulation could be recovered by returning the plants to  
8 a normal regime.

9

### 10 **Different light conditions affect mycelial growth of *Hpa* in leaves**

11 Considering that plants grown under constant light for 7d supported abundant *Hpa*  
12 sporulation after they were returned to a normal 12h L / 12 D regime (Figure 2), it  
13 seemed likely that mycelium may have grown inside the leaf during exposure to  
14 constant light but did not produce sporangia until a normal light regime was restored.  
15 To check this possibility, infected *At* seedlings were stained with trypan blue 3dpi.  
16 Trypan blue staining highlights mycelial growth along with sexual spore (oospores)  
17 that are produced in the interior of the leaf and asexual fruiting bodies (sporangia) that  
18 form on the exterior of the leaf.

19

20 In plants grown under the normal light cycle, mycelia had grown throughout  
21 cotyledons, sporangia had formed, and sporulation was observed over the whole  
22 surface of the cotyledon (Figure 3a). In contrast to the normal light cycle, in cotyledons  
23 exposed to constant light, there were extensive mycelia 3dpi and abundant oospores  
24 but no conidiophores (Figure 3b). These results indicate that vegetative growth and  
25 sexual sporulation can proceed under constant light, but asexual sporulation is  
26 suppressed.

1

2 In cotyledons exposed to constant dark, less mycelial development was observed in  
3 those that were exposed to either a normal light cycle or constant light (Figure 3c). A  
4 small number of oospores were observed, similar to that observed under the constant  
5 light experiment.

6

7 To precisely assess *Hpa* growth *in planta*, we used a quantitative PCR assay in which  
8 *Hpa* DNA is quantified as a proxy for pathogen biomass. During evaluation over three  
9 days, mycelium biomass showed an increase in all groups (Figure 4). However, the  
10 lowest biomass was observed with constant dark exposure, whilst the constant light  
11 gave the highest biomass production in every day. Constant light conditions produced  
12 a significant increase in biomass compared to that observed with normal light  
13 conditions, especially at 3dpi. On the other hand, under constant dark conditions,  
14 biomass was significantly decreased compared to that obtained with the normal light  
15 conditions (Figure 4). Altogether, these results confirm that light is an important factor  
16 for vegetative growth and reproduction for *Hpa*.

17

### 18 **Different light conditions affect spore germination**

19 Because the light and dark affect *Hpa* vegetative growth and sporulation, we  
20 questioned whether the light or dark affect germination of spores and whether it is  
21 necessary to have a regular light/dark regime for germination. It is challenging to  
22 accurately quantify germination on plant leaves, because trypan blue staining and  
23 clearing during the early stages of infection eliminate spores on the leaf surface. Thus,  
24 cellophane strips were used for germination assays instead of seedlings.

25

1 The germination assay was first carried out with the reference light regime (12h L / 12h  
2 D). Under this regime, spores germinate after six to eight hours and a germ tube  
3 emerges (Figure 5a). After 12 and 24h, germ tubes have extended on the surface of  
4 the cellophane (Figure 5b and c). After 48 hours, formation of mycelial branches was  
5 obvious and most branches were laterally oriented as they covered the surface (Figure  
6 5d).

7  
8 Germination using cellophane strips under constant light and constant dark was  
9 assessed in comparison to the reference light regime. The germination rate under the  
10 reference regime was 33% after 24 hours. The spores which were exposed to 24  
11 hours constant dark showed a 22% germination rate, which was the lowest  
12 percentage observed within this time period. Under constant light after 24 hours, 37%  
13 of *Hpa* spores were germinated on cellophane (Figure 6). After 48h, the germination  
14 percentage increased for all treatments. The germination rate under constant dark  
15 was the lowest with 31%, the reference regime was 57% and constant light was 49%.  
16 After 72h, interestingly, the percentage of germination under constant dark and  
17 constant light was the same. However, in the reference light regime, germination  
18 increased and reached the highest percentage. At the end of 3d, germination seemed  
19 to be completed and spores appeared to have lost their viability. These results  
20 indicate that light is an important factor for spore germination independently of the  
21 host, and that optimal germination of spores occurs under a normal light/dark regime.

### 22 23 ***Hpa* mycelial biomass growth is affected by inoculation time**

24 If there is a synchronized circadian regulation of *Hpa* development and host defence,  
25 the inoculation time should be important for optimal colonization. Accordingly, previous  
26 reports have demonstrated that the time of day for inoculation can impact the degree

1 to which *Hpa* can successfully colonize *Arabidopsis*, due at least in part to circadian  
2 upregulation of host immune responses during a time period that encompasses  
3 subjective dawn. Due to these observations, the optimal infection time for *Hpa*  
4 development was not obvious. Therefore, biomass productions between two  
5 inoculation times was compared using qPCR. Two zeitgeber time points were  
6 determined to observe the effect of day and night (or light and dark) on the  
7 development of pathogenicity. ZT0 refers to the beginning of daylight in an entrained  
8 cycle and ZT12 is the beginning of night, under experimental conditions of 12h L/ 12h  
9 D). One sample was inoculated at dawn (ZT0); beginning of the light period then  
10 followed by the dark period, therefore this sample was called L/D. The other sample  
11 was set up as the opposite; with inoculation at dusk (ZT12), called D/L. To determine  
12 the dynamic range of qPCR assays, we used an infection time course of virulent *Hpa*-  
13 Emoy2 on *Col-rpp4* (Figure 7). All samples showed a greater biomass of mycelium on  
14 the D/L cycle than L/D cycle and showed a regular increase in mycelium growth over  
15 the three days (Figure 7). The highest biomass was observed in the D/L cycle, where  
16 by three dpi, pathogen biomass in samples under the D/L cycle was approximately 56%  
17 higher than in samples inoculated under L/D cycle. The results suggest that initiating  
18 infection at dusk promotes a higher degree of virulence than initiating infection at dawn.

19

## 20 **Continuous light/dark regimes activate an immune response biomarker in** 21 **plants**

22 Plant immune responses are characterized by the activation of a set of pathogenesis-  
23 related (*PR*) genes (Ward et al., 1991; Uknes et al., 1992). A *PR1promoter-GUS*  
24 reporter gene is considered to be a valid marker gene for activation of immunity in *A.*  
25 *thaliana* (Uknes et al., 1992), enabling transgenic *Arabidopsis PR1-GUS* plants to be  
26 employed to detect activation of immune responses. We set up an experiment to test

1 whether the reporter gene activity can be induced by constant light and constant dark  
2 treatment with the transgenic plants containing *PR1-GUS*. In this assay, when the *GUS*  
3 reporter gene is activated by any stress factor, the plant tissues are observed to be  
4 stained blue.

5

6 In *Arabidopsis* seedlings grown under normal light regime with no pathogen infection,  
7 there were no blue stained cells indicating that the *GUS* gene was not induced under  
8 this condition, as expected (Figure 4a). Contrastingly, seedlings exposed to constant  
9 light (Figure 4b) and constant dark (Figure 4c) for 72h showed *GUS* activity, indicating  
10 constant light and dark regimes trigger immunity. These results indicate that induction  
11 of immunity under constant light or dark exposure could contribute to the suppression  
12 of the sporulation of *Hpa*.

13

## 14 **Materials and methods**

15

### 16 **Plant lines, pathogen isolates and propagation**

17 *Hyaloperonospora arabidopsidis* isolate Emoy2 were maintained on *Ws-eds1*  
18 (Parker *et al.*, 1996) or *Col-rpp4* (Roux *et al.*, 2011). Maintenance and preparation of  
19 inoculum for experiments was performed as described previously (Tör *et al.*, 2002;  
20 Woods-Tör 2018). Transgenic *PR1-GUS* lines were obtained from Xinnian Dong.

21

### 22 **Sporulation assay**

23 Inoculated *Col-rpp4* seedlings were exposed to 3 different light (L) /dark (D) periods;  
24 12h L/12h D, 14h L/10h D and 10h L/14h D for 7 d at 16°C and the amount of  
25 sporulation was assessed.

26

1 Another experiment was designed to understand the effect of extreme light regimes on  
2 *Hpa* sporulation. The inoculated samples were exposed to 4 different light regimes; 7 d  
3 constant light, 7 d constant dark, constant light after 3dpi and constant dark after 3dpi,  
4 and control light/dark regime (12h L/ 12h D) was also included. As a light source, white  
5 fluorescent bulbs (300 mmol m $\pm$ 2 s $\pm$ 1, 10 Osram HQIL 400 W-lamps plus four Osram  
6 L40/ W60 fluorescent bulbs; Osram, Berlin, Germany) were used. To quantify  
7 sporulation, 10 infected seedlings from each replicate were taken and placed into an  
8 Eppendorf tube containing 250 $\mu$ l H<sub>2</sub>O. Samples were vortexed and conidiospores were  
9 counted using a haemocytometer. All experiments had minimum three replicas and  
10 were repeated 3 times. All results were evaluated and compared statistically.

11

## 12 **Trypan blue staining**

13 Cotyledons of 7 d old *Col-rpp4* were spray inoculated with *Hpa*-Emoy2 and were  
14 exposed to a normal 12h L / 12h D cycle, constant light or constant dark and examined  
15 at 3 dpi after staining with Trypan Blue as described at below;

16 Seedlings were taken from infected samples at the 0 hrs, 12 hrs, 1d, 2d, 3d, 4d, 5d,  
17 6d, 7d post inoculation (dpi). Infected leaf segments were placed in an Eppendorf tube,  
18 covered with 1 ml or enough amount trypan blue solution (10 g phenol, 10 ml glycerol,  
19 10 ml lactic acid, 10ml water and 0.02 g of trypan blue (Merck) in ethanol (96%; 1:2  
20 v/v) and boiled at 100 °C for 1 min. The leaf segments were then de-stained for an  
21 hour in chloral hydrate (2mg/ml) (Sigma). All steps were carried out in a fume hood.  
22 Pathogen structures were viewed under a CARL Zeiss Axioskop 4 plus microscope.

23

## 24 **GUS assay**



1 Transgenic *PR1-GUS* lines were used. Three-week-old seedlings were exposed to  
2 constant light or dark for 1 to 3 days. Then, seedlings were transferred to 24 well replica  
3 plates that contained 1 ml X-Gluc histochemical staining solution (50 mM X-Gluc in 50  
4 mM NaPO<sub>4</sub> pH 7.0) and incubated overnight at 37 °C. After staining, leaves were treated  
5 with 70% methanol up to 4 h. The samples were washed with ethanol, immersed in  
6 glycerol and tissues were examined for GUS staining under dissecting microscope.

7

### 8 **Germination assay using cellophane**

9 The germination assay using cellophane on MS (Murashige and Skoog, 1962) was  
10 carried out as described (Bilir et al., 2019). Sterile pieces of cellophane were placed  
11 on the surface of MS agar in the flow cabinet. *Hpa* spore solution was prepared and  
12 centrifuged, all spores collected, and the pellet was then resuspended in sterile water.  
13 Approximately 10 µl spore solution were dropped on each piece of cellophane. Plates  
14 was grouped and put in the 3 different incubators; constant light, constant dark and  
15 12h L/12h D regime at 16°C during 72h and examined every 12h under microscope.  
16 The number of germinated *Hpa* spores was counted using a haemocytometer.

17

### 18 **Determining biomass growth using qPCR.**

19 The biomass of mycelium produced by *Hpa-Emoy2* up to 3dpi was measured from  
20 samples exposed to three different light regimes by Real-Time Quantitative PCR (RT-  
21 qPCR). The *Hpa-Actin* gene and *At-Actin* gene were used for quantification and its  
22 relative protocol was followed as described (Anderson and McDowell, 2015). After  
23 *Col-rpp4* seedlings were inoculated with *Hpa-Emoy2*, samples were separated and  
24 placed under normal (D/L), constant light and constant dark regime as three different  
25 groups. Every 24h, samples were taken, and their DNA extracted and calculated with  
26 qPCR as described (Livak and Schmittgen, 2001). Sequences of primers used were

1 Hpa-Actin/F 5'- GTTTACTACCACGGCCGAGC-3', Hpa-Actin/R 5-  
2 CGTACGGAAACGTTTCATTGC-3', At-Actin/F 5'- AGCATCTGGTCTGCGAGTTC-3',  
3 and At-Actin/R 5'- ACGGATTTAATGACACAATGGC-3'.

4

## 5 **Statistical analysis**

6 For statistical analysis, paired Student's *t*-tests were performed on data obtained from  
7 plant infection and germination assays.

8

## 9 **Discussion**

10 Using *Hpa-Arabidopsis* reference system, we showed that light regimes significantly  
11 affect several stages of the *Hpa* disease cycle, including spore germination, mycelial  
12 development, oospore formation and sporulation. We also obtained preliminary result  
13 suggesting that light regimes can also influence the immune status of the host. These  
14 observations complement recent studies showing that the plant circadian clock system  
15 regulates the immune system in the interactions between *Arabidopsis* and *Hpa* (Wang  
16 *et al.*, 2011; Zhang *et al.*, 2013). However, the previous studies focused mainly on  
17 incompatible interactions with resistant plant hosts and did not address how light might  
18 impact *Hpa* in a disease-susceptible host. Therefore, this work was undertaken to  
19 investigate the effect of light on a virulent *Hpa* isolate.

20 Our first observation was that an entrained light/dark cycle was necessary for *Hpa* to  
21 efficiently complete its life cycle in the host. We observed only minor differences in spore  
22 production from plants grown in three different light regimes (14h L / 10h D, 12h L / 12h  
23 D and 10h L / 14h D; Figure 1) and selected 12h L / 12h D as a reference regime for  
24 pathogen for ongoing experiments.

1 We then exposed plants to constant light or dark regimes, commencing after three dpi  
2 for four days total or immediately following infection for seven days. All of these regimes  
3 had a suppressive effect on sporulation (Figure 2). Similar inhibitory effects of light on  
4 sporulation of fungal and oomycete pathogens, including downy mildews, have been  
5 reported for decades [referenced in the Introduction and reviewed in (Rotem et al.,  
6 1978)]. However, these studies generally have not directly addressed whether  
7 constant light inhibited vegetative (mycelial) growth in planta and/or sporulation. We  
8 assessed *Hpa* growth in the leaves with quantitative PCR and with Trypan Blue  
9 staining. Both assays indicated that *Hpa* growth was moderately inhibited in dark  
10 grown plants but was not inhibited in plants exposed to constant light. Indeed,  
11 constant light supported higher levels of *Hpa* biomass than that in normal light/dark  
12 or constant dark regimes. In trypan blue staining experiments, in the normal light  
13 regime, the initial stages of conidiophore development were observed at 3 dpi, while  
14 in constant light experiments, abundant oospore formation was observed 3dpi. This  
15 may indicate that constant light exposure could inhibit asexual sporangiophore  
16 development while acting as an inducer of oospore formation.

17 Interestingly, this apparent inhibition of asexual sporulation by constant light or dark  
18 was reversible: plants that were returned to the reference light regime after four days  
19 of constant light or dark could support abundant sporangiophore production. Similar  
20 observations have been reported for other downy mildew pathogens, for which a  
21 “recovery” period of four hours in the dark was sufficient to enable sporulation  
22 (reviewed in Rotem et al., 1978). The mechanism behind this recovery is unknown  
23 but was postulated at the time to involve enzymatic degradation of a light-induced  
24 “antisporulant”. Such hypotheses can now be tested with the experimental tools of  
25 the *Hpa*-*Arabidopsis* pathosystem.

26

1 In this context, we tested whether constant light or dark-treatment was sufficient to  
2 activate the plant immune system in the absence of pathogen infection. Using transgenic  
3 plants containing a fusion of *PR1* promoter to a *GUS* reporter gene, it was clear that  
4 after 24h, the *PR1* promoter was activated by 24h constant light and 48h constant dark  
5 (Figure 4). These results are similar to those reported in previous publications (Evrard  
6 et al., 2009). It has been reported that plant defence responses and HR-associated  
7 programmed cell death triggered by pathogen is activated by light in tobacco  
8 (*Nicotiana tabacum*), rice (*Oryza sativa*), and *Arabidopsis*, and the activation of  
9 inducible resistance is dependent on phytochrome functions (Guo et al., 1993;  
10 Chandra-Shekara et al., 2006). The blue light receptor cryptochromes (*CRY*) and  
11 red/far-red light photoreceptor phytochromes (*PHY*) work together in *Arabidopsis* and  
12 they regulate many light-controlled defence responses and entrainment of the  
13 circadian clock. The photoreceptor gene *CRY1* regulate systemic acquired resistance  
14 (SAR) positively and in the *cry1* mutant, salicylic acid (SA)-induced pathogenesis-  
15 related gene *PR-1* expression is reduced but enhanced in *CRY1-ovx* (*CRY1*-  
16 *overexpressor*) plants under light conditions (Liang and Hong-Quan, 2010).

17

18 We also tested whether the timing of inoculation affected *Hpa*'s capacity to colonize  
19 the plant. A previous report demonstrated that effector-triggered immunity and basal  
20 immunity against *Hpa* is more efficient early in the day (Wang et al., 2011), and we  
21 confirmed this observation by using a different virulent isolate of *Hpa*. Our results  
22 demonstrate that plants inoculated at dusk supported significantly more mycelial  
23 growth than plants inoculated at dawn, even at three dpi. Our experiments do not  
24 point directly to an underlying mechanism, but we hypothesize that this might reflect  
25 a difference in timing of basal defense mechanisms that limit growth of virulent *Hpa*.  
26 Wang et al (2011) noted that SA-dependent gene expression was stronger in the day

1 than at night; accordingly, it was reported that morning and midday inoculations lead  
2 to higher salicylic acid accumulation, quicker and more intense *PR* (pathogen-related)  
3 gene activation and expression, and HR responses than inoculations in the dusk or  
4 at night (Griebel and Zeier, 2008). These previous reports on different systems  
5 support our data and help to explain why night time inoculation is more efficient than  
6 day time inoculation (Figure 8).

7

8 It is important to emphasize that all experiments involving *Hpa* grown *in planta* could  
9 reflect influence of light on both the pathogen and the host. Fungal and oomycete  
10 pathogens have been shown previously to incorporate light perception into their  
11 development and virulence programs. For example, 48h constant white light exposure  
12 inhibits sporulation of *P. infestans* on potato or agar plates (Xiang and Judelson, 2014).  
13 Because *Hpa* is an obligate pathogen that can only complete its life cycle on a  
14 compatible *Arabidopsis* host, we cannot directly assess how light influences  
15 sporulation apart from the host. However, our *in vitro* spore germination assay  
16 indicates that light does affect the *Hpa* life cycle and suggests that *Hpa* can perceive  
17 light.

18

19 In conclusion, we have reported several lines of evidence that light is a critical factor  
20 during development of downy mildew disease on *Arabidopsis* and can influence  
21 responses in the pathogen and the host. We can now exploit this system to understand  
22 the mechanistic basis of these effects, using the well-developed tools for *Arabidopsis*  
23 in combination with a new protocol for reverse genetics in *Hpa*. Our future studies will  
24 focus on circadian regulation on both the host and pathogen side. While it is well-  
25 established that circadian regulation of host immunity is an important factor in immunity  
26 against *Hpa* and other pathogens in *Arabidopsis*, the role of circadian regulation in

1 oomycete virulence is unexplored and therefore could be an enlightening area for  
2 future inquiries.

3

#### 4 **Conflict of Interest**

5 The authors declare that there is no conflict of interests

6

#### 7 **Author contributions**

8 MT and OT planned and designed the research. OT and CJQ conducted the  
9 laboratory work. MT, OT and JMM analyzed and interpreted the data and wrote the  
10 manuscript.

11

#### 12 **Funding**

13 Financial supports for O. Telli from the Turkish Ministry of Education and for C.  
14 Jimenez-Quiros from the University of Worcester are gratefully acknowledged.

15

#### 16 **Data availability statement**

17 The data that support the findings of this study are available from the corresponding  
18 author on reasonable request.

19

#### 20 **References**

21 Anderson RG, McDowell JM, 2015. A PCR assay for the quantification of growth of  
22 the oomycete pathogen *Hyaloperonospora arabidopsidis* in *Arabidopsis thaliana*.  
23 *Molecular Plant Pathology* **16**, 893-898.

- 1 Bilir Ö, Telli O, Norman C, Budak H, Hong Y, Tör M, 2019. Small RNA inhibits infection  
2 by downy mildew pathogen *Hyaloperonospora arabidopsidis*. *Molecular Plant*  
3 *Pathology* **20**, 1523-1534.
- 4 Carlile MJ, 1970. The photoresponses of fungi. In *Photobiology of microorganisms*  
5 (Halladal, P., ed.), Wiley-Interscience, pp.309-344.
- 6 Chandra-Shekara AC, Gupte M, Navarre D, Raina S, Raina R, Klessig D, Kachroo  
7 P, 2006. Light-dependent hypersensitive response and resistance signaling against  
8 Turnip Crinkle Virus in Arabidopsis. *Plant Journal* **45**: 320–334.
- 9 Cheng YT, Zhang, L, He SY, 2019. Plant-Microbe Interactions Facing Environmental  
10 Challenge. *Cell Host Microbe* 26: 183-192.
- 11 Coates ME, Beynon JL, 2010. *Hyaloperonospora arabidopsidis* as a pathogen model.  
12 *Annual Review of Phytopathology* **48**, 329-45
- 13 Dangl JL, Holub EB, Debener T, Lehnackers H, Ritter C, Crute IR, 1992. Genetic  
14 definition of loci involved in *Arabidopsis*-pathogen interactions. In *Methods in*  
15 *Arabidopsis* Research. (C. Koncz, N.-H. Chua, and J. Schell, eds.) Pages 393-418  
16 World Scientific Pub., Singapore.
- 17 Dunlap JC, Loros JJ, DeCoursey PJ, 2004, Chronobiology: biological timekeeping.  
18 Sinauer Associates, Inc., Sunderland, Massachusetts, 382 p. ISBN 0-87893-149.
- 19 Evrard A, Ndatimana T, Eulgem T, 2009. FORCA, a promoter element that responds  
20 to crosstalk between defense and light signaling. *BMC Plant Biology* **9**, 2
- 21 Franklin KA, Lerner VS and Whitelam GC, 2005. The signal transducing  
22 photoreceptors of plants. *International Journal of Developmental Biology* **49**, 653–  
23 664.

- 1 Fried PM, Stuteville DL, 1977. *Peronospora trifoliorum* sporangium development and  
2 effects of humidity and light on discharge and germination. *Phytopathology* **67**, 890-  
3 894.
- 4 Griebel T, Zeier J, 2008. Light regulation and daytime dependency of inducible plant  
5 defenses in Arabidopsis: phytochrome signaling controls systemic acquired  
6 resistance rather than local defense. *Plant Physiology* **147**, 790-801.
- 7 Guo A, Reimers PJ, Leach JE, 1993. Effect of light on incompatible interactions  
8 between *Xanthomonas oryzae* pv *oryzae* and rice. *Physiological and Molecular Plant*  
9 *Pathology* **42**, 413–425.
- 10 Harnish WN, 1965. Effect of light on production of oospores and sporangia in  
11 species of *Phytophthora*. *Mycologia* **57**: 85–90.
- 12 Herlihy J, Ludwig NR, van den Ackerveken G, McDowell JM, 2019. Oomycetes used  
13 in Arabidopsis Research. In The Arabidopsis Book. <https://doi.org/10.1199/tab.0188>
- 14 Hevia MA, Canessa P, Müller-Esparza H, Larrondo LF, 2015. A circadian oscillator  
15 in the fungus *Botrytis cinerea* regulates virulence when infecting *Arabidopsis*  
16 *thaliana*. *Proc Natl Acad Sci U S A*. **112**: 8744–8749.
- 17 Johnson, CH, Elliott JA, Foster R, 2003. Entrainment of circadian programs.  
18 *Chronobiology International* **20**, 741–774.
- 19 Kamoun S, Furzer O, Jones JD, Judelson HS, Ali GS, Dalio RJ, Roy SG, et al.,  
20 2015. The Top 10 oomycete pathogens in molecular plant pathology. *Molecular*  
21 *Plant Pathology* **16**: 413-434.
- 22 Karapetyan S, Dong, X, 2018. Redox and the circadian clock in plant immunity: A  
23 balancing act. *Free Radical Biology and Medicine* **119**: 56-61.



- 1 Leach CM, Hildebrand PD, Sutton JC, 1982. Sporangium discharge by *Peronospora*  
2 *destructor*: Influence of humidity, red- infrared radiation, and vibration.  
3 *Phytopathology* **72**, 1052 - 1056.
- 4 Lu H, McClung CR, Zhang C, 2017. Tick Tock: Circadian Regulation of Plant Innate  
5 Immunity. *Annual Review of Phytopathology* **55**: 285-311.
- 6 Livak KJ, Schmittgen TD, 2001. Analysis of relative gene expression data using real-  
7 time quantitative PCR and the  $2(-\Delta\Delta C(T))$  method. *Methods* **25**, 402–408.
- 8 Millar AJ, 2004. Input signals to the plant circadian clock. *Journal of Experimental*  
9 *Botany* **55**, 277–283.
- 10 Nordskog B, Gadoury DM, Seem RC, Hermansen A, 2007. Impact of diurnal  
11 periodicity, temperature and light on sporulation of *Bremia lactucae*. *Phytopathology*  
12 **97**, 979–986.
- 13 Parker JE, Holub EB, Frost LN, Falk A, Gunn ND, Daniels MJ, 1996.  
14 Characterization of *eds1*, a mutation in Arabidopsis suppressing resistance to  
15 *Peronospora parasitica* specified by several different *RPP* genes. *Plant Cell* **8**, 2033-  
16 2046.
- 17 Rotem J, Cohen Y, Bashi E, 1978. Host and environmental influences on sporulation  
18 in vivo. *Annual Review of Phytopathology* **16**, 83–101.
- 19 Roux M, Schwessinger B, Albrecht C, Chinchilla D, Jones A, Holton N, Malinovsky  
20 FG, Tör M, de Vries S, Zipfel C, 2011. The *Arabidopsis* leucine-rich repeat receptor–  
21 like kinases BAK1/SERK3 and BKK1/SERK4 are required for innate immunity to  
22 hemibiotrophic and biotrophic pathogens. *The Plant Cell*, **23**, 2440-2455.

- 1 Rumbolz J., Wirtz S., Kassemeyer H.H., Guggenheim R., Schäfer E., Büche C.  
2 (2002). Sporulation of *Plasmopara viticola*: differentiation and light regulation. *Plant*  
3 *Biol.* **4**, 413-422.
- 4 Su H, van-Bruggen AHC, Subbarao KV, 2000. Spore release of *Bremia lactucae* on  
5 lettuce is affected by timing of light initiation and decrease in relative humidity.  
6 *Phytopathology* **90**, 67-71.
- 7 Tör M, Gordon P, Cuzick A, Eulgem T, Sinapidou E, Mert-Türk F, Can C, Dangl  
8 JL, Holub EB, 2002. Arabidopsis SGT1b Is required for defense signaling conferred  
9 by several downy mildew resistance genes. *The Plant Cell* **14**, 993–1003.
- 10 Uknes S, Mauch-Mani B., Moyer M, Potter S, Williams S, Dincher S, Chandler D,  
11 Slusarenko A, Ward E, Ryals J, 1992. Acquired resistance in Arabidopsis. *The Plant*  
12 *Cell* **4**, 645–656
- 13 Wang W, Barnaby JY, Tada Y, Li H, Tör M, Caldelari D, Lee D-U, Fu X, Dong X,  
14 2011. Timing of plant immune responses by a central circadian regulator. *Nature*,  
15 **470**, 110-114.
- 16 Ward ER, Uknes SJ, Williams SC, Dincher SS, Wiederhold DL, Alexander DC, Ahl-  
17 Goy P, Métraux JP, Ryals JA, 1991. Coordinate gene activity in response to agents  
18 that induce systemic acquired resistance. *The Plant Cell* **3**, 1085–1094.
- 19 Xiang Q, Judelson HS, 2014. Myb transcription factors and light regulate sporulation  
20 in the oomycete *Phytophthora infestans*. *PLoS ONE* **9**: e92086.
- 21

1 Zhang C, Xie Q, Anderson RG, Ng G, Seitz NC, Peterson T, et al. (2013) Crosstalk  
2 between the Circadian Clock and Innate Immunity in *Arabidopsis*. *PLoS Pathog* 9:  
3 e1003370.

4

5

## 6 **Figure Legends**

7

8 **Figure 1. Optimization of the Light/Dark period for sporulation of *Hpa*.** Three  
9 different light/dark periods were tested to compare the amount of *Hpa* sporulation  
10 sporulation. These periods were 14h L / 10h D, 12h L / 12h D, and 10h L / 14h D.  
11 Spores were harvested 4-7dpi and counted using a haemocytometer. Average and  
12 standard error of 3 replicates are shown. This experiment was repeated three times  
13 with similar results

14

15 **Figure 2. Amount of sporulation under different light regimes. a)** Five different  
16 light/dark conditions were tested. These were 12h L / 12 h D (Dotted column), constant  
17 light after 3dpi (blank column), constant dark after 3dpi (black column), constant light  
18 exposure during 7d (grey/white column), constant dark exposure during 7d (black/grey  
19 column). Spores were harvested 4-7 dpi and counted using a haemocytometer. **b)**  
20 Samples were exposed to the reference light regime during the first 3 days (D/L black  
21 column), then were exposed to constant light (light grey column) or constant dark (dark  
22 grey column) over the subsequent 4 days (4dpi-7dpi). After end of the 7dpi, the  
23 samples were transferred to the reference light regime again and sporulation was  
24 recorded until 11dpi. **c)** Samples were exposed to constant light or constant dark for  
25 7days immediately after inoculation. After 7dpi samples were transferred to the normal  
26 light regime again and sporulation was recorded until 11 dpi. **d)** Samples were

1 exposed to constant light or constant dark beginning immediately after inoculation for 3  
2 days, then shifted to a normal light regime, with sporulation recorded at 4 and 7 dpi. All  
3 experiments were repeated 3 times. All results were evaluated and compared  
4 statistically. \*P < 0.05, \*\*P < 0.01, \*\*\*P < 0.001, paired Student's *t*-test

5

6 **Figure 3. *Hpa* mycelial development in *At* leaves under different light regimes.**

7 **a)** Infected plants grown under the reference 12h light/ 12h dark cycle, **b)** Infected  
8 plants grown under a constant light regime, and **c)** Infected plants grown under  
9 constant dark regime. Infected *At* seedlings were stained with trypan blue 3dpi.

10

11 **Figure 4. *Hpa* mycelial biomass production under different light regimes.**

12 Normal light (lined column), constant light (blank column) and constant dark (black  
13 column) regimes were applied. After *Hpa* inoculation, samples were taken every day  
14 from infected *At* leaves until 3dpi as mycelial growing phase is usually completed  
15 within first 3 days. In all samples, mycelial growth is calculated by qPCR and  
16 compared with each other. Student's *t* test, \*P < 0.05.

17

18 **Figure 5. Germination of *Hpa* spores on cellophane under 12h L / 12h D regime.**

19 Spores were placed on cellophane strips and examined at regular intervals. **a)** after  
20 6h, spore was germinated and germ tube was produced, **b and c)** after 12 and 24h,  
21 respectively, germ tube became longer, **d)** after 48h, lateral mycelial branches were  
22 obvious and hyphae began to cover the surface of the cellophane.

23

24 **Figure 6. Germination rate of *Hpa* spores under different light conditions on**

25 **cellophane.** The spore germination on cellophane, which exposed to constant light  
26 (blank column), constant dark (black column) and 12h L/ 12h D (lined column) regime

1 was determined after 24h, 48h and 72h. Values represent means of three  
2 experiments, and error bars correspond to the standard error of the means. Asterisks  
3 indicate statistically significant differences to the reference regime in two-tailed  
4 Student's *t*-test ( $p < 0,05$ ).

5

6 **Figure 7. Effect of inoculation time on *Hpa-Emoy2* biomass on *Col-rpp4*.** *Col-*  
7 *rpp4* seedlings were infected with *Hpa-Emoy2* at dawn (ZT=0), labelled LD (white  
8 dotted column) or at beginning of the dark period (ZT=12) labelled DL (black lined  
9 column). At the end of each day, samples were taken and biomass was calculated  
10 using qPCR and compared with each other. Student's *t* test, \*P < 0.05.

11

12 **Figure 8. *GUS* expression in *At* seedlings exposed to different light regimes. a)**  
13 **Seedlings grown under normal 12h L / 12h D regime. b) Seedlings exposed to**  
14 **constant light. c) Seedlings exposed to constant dark. After 48 hours of exposure to**  
15 **these regimes, histochemical *GUS* assays were carried out. These experiments were**  
16 **repeated 3 times with similar results.**

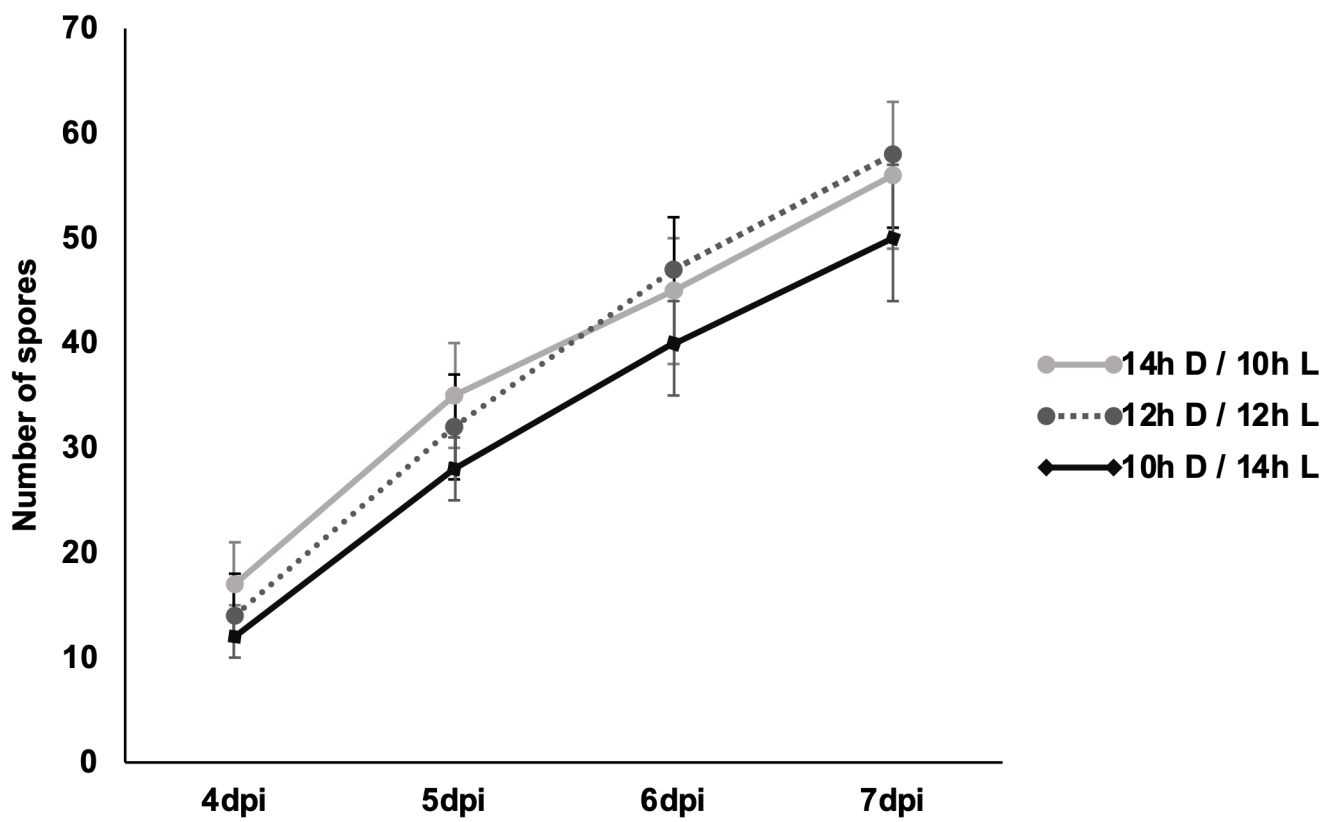

Figure 1

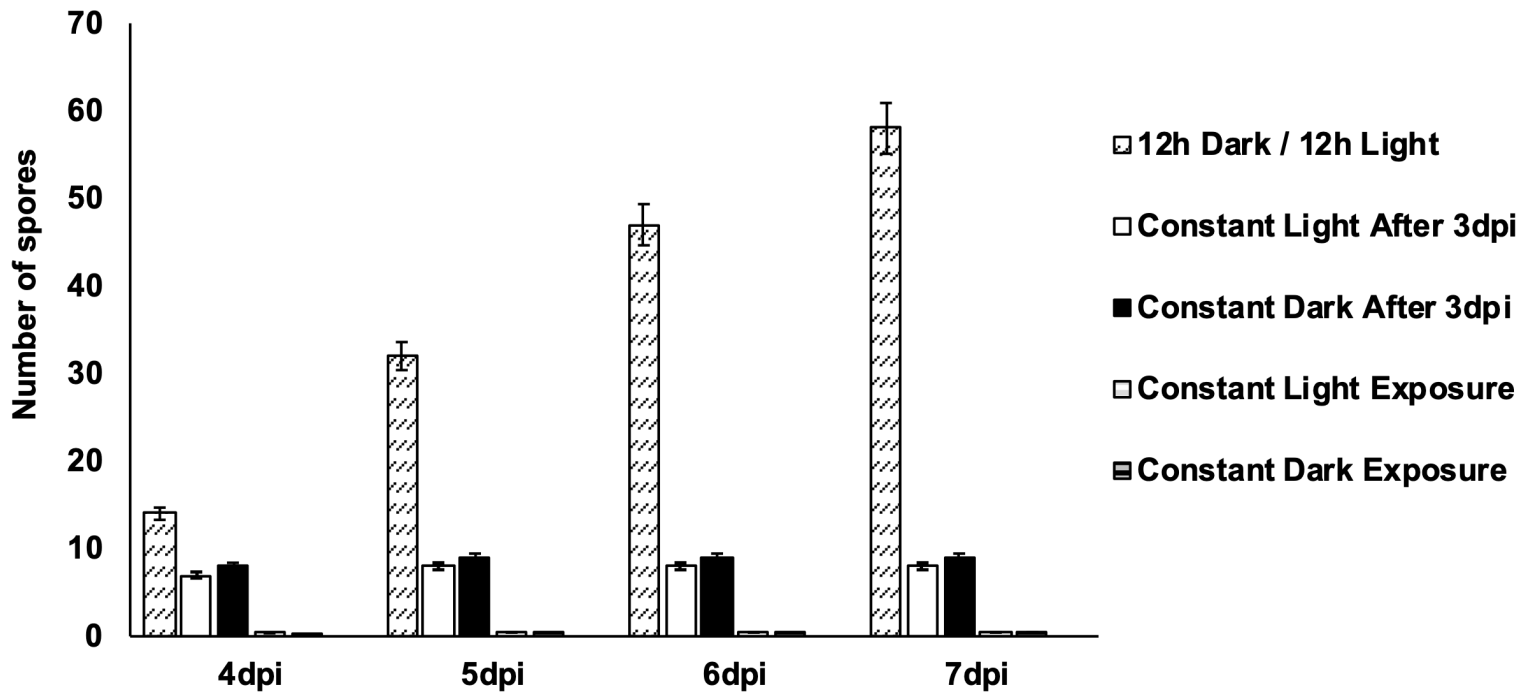

Figure 2A

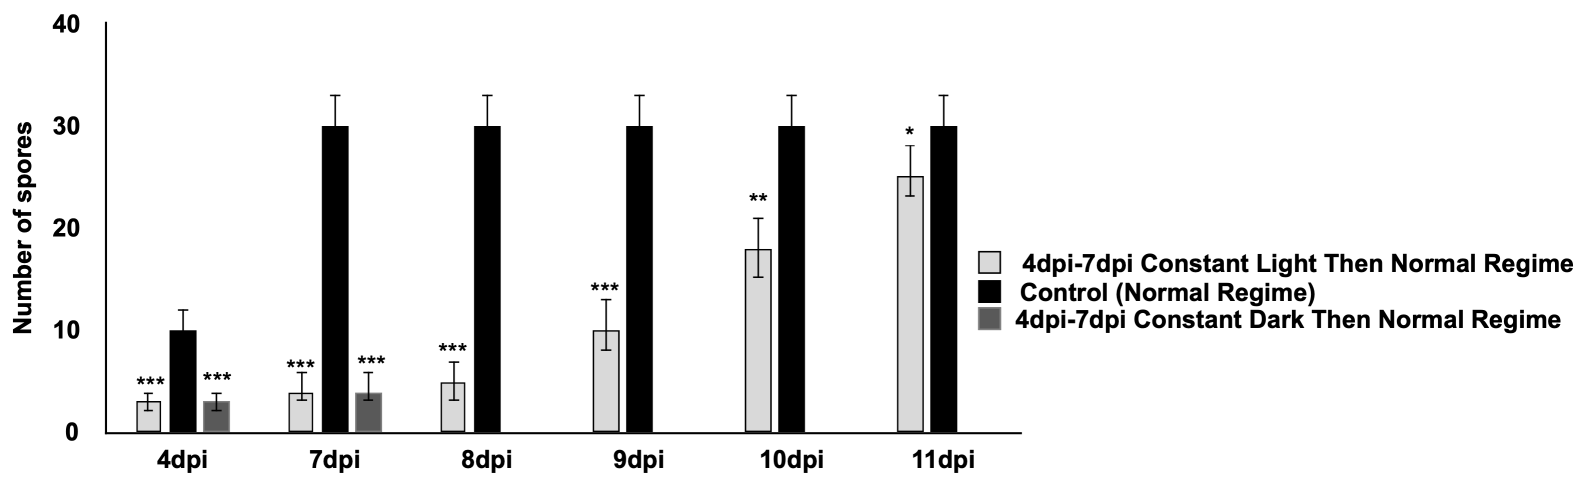

Figure 2B



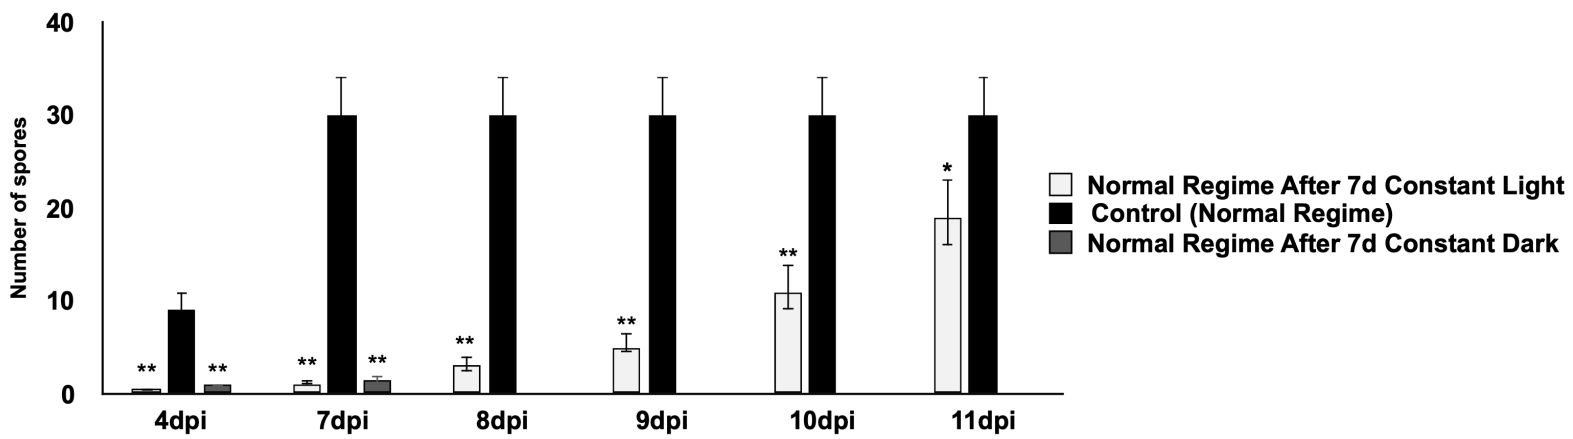

Figure 2C

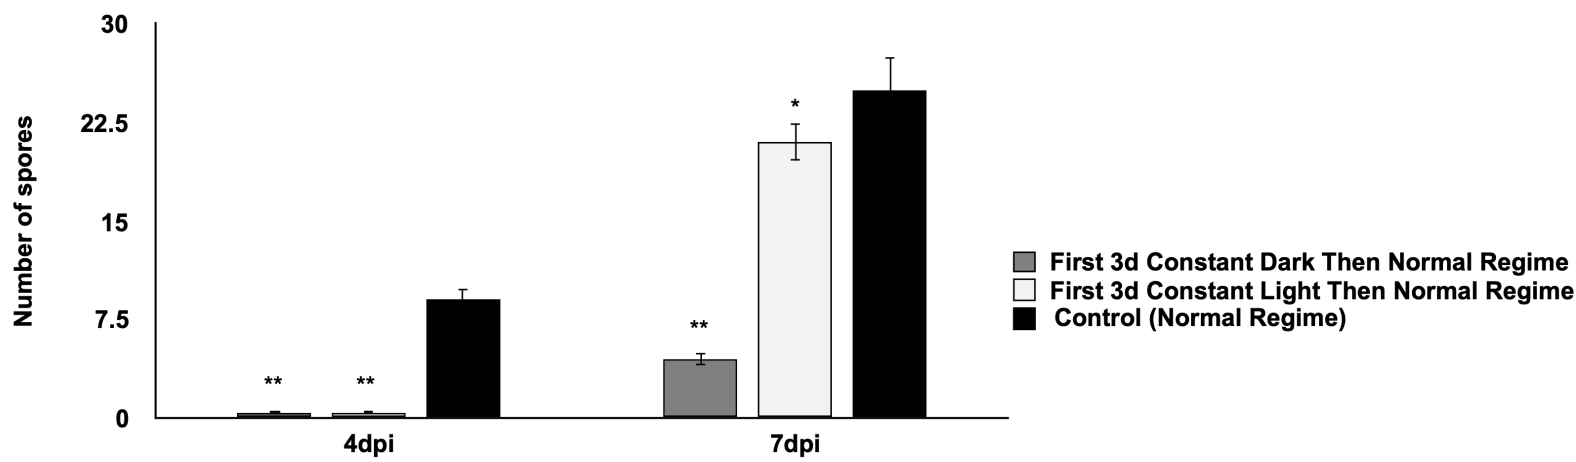

Figure 2D

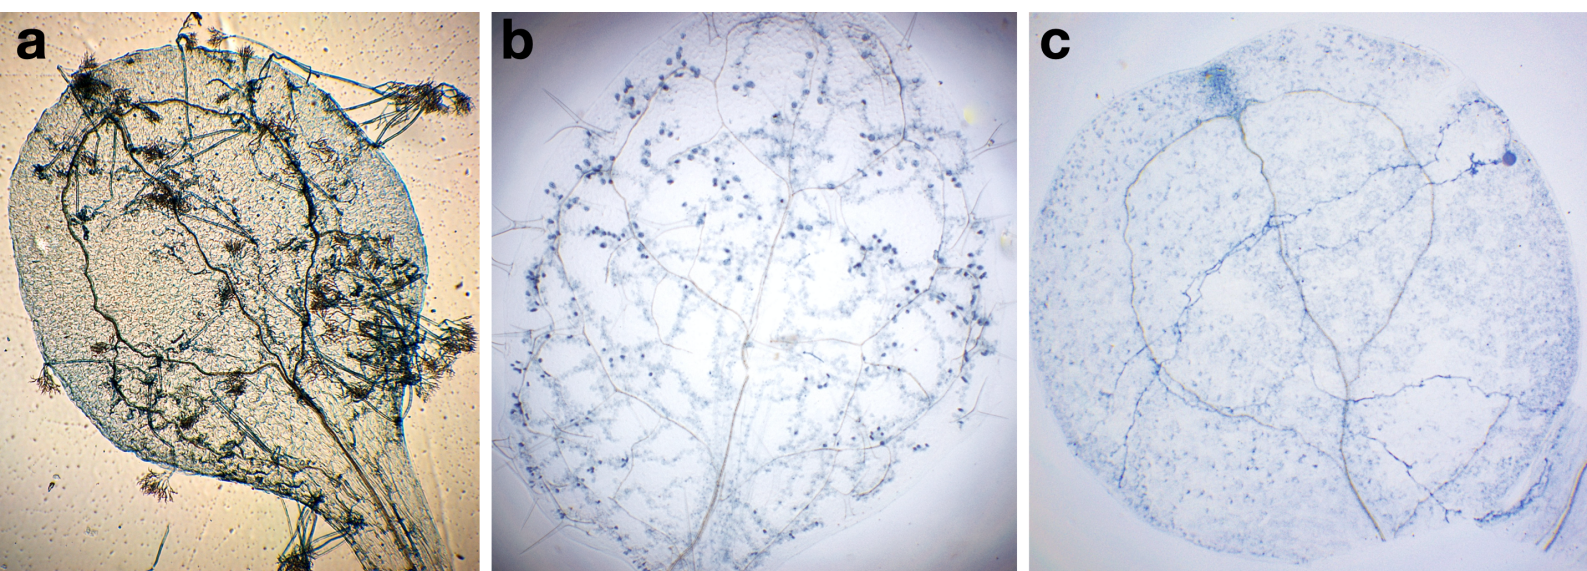

Figure 3

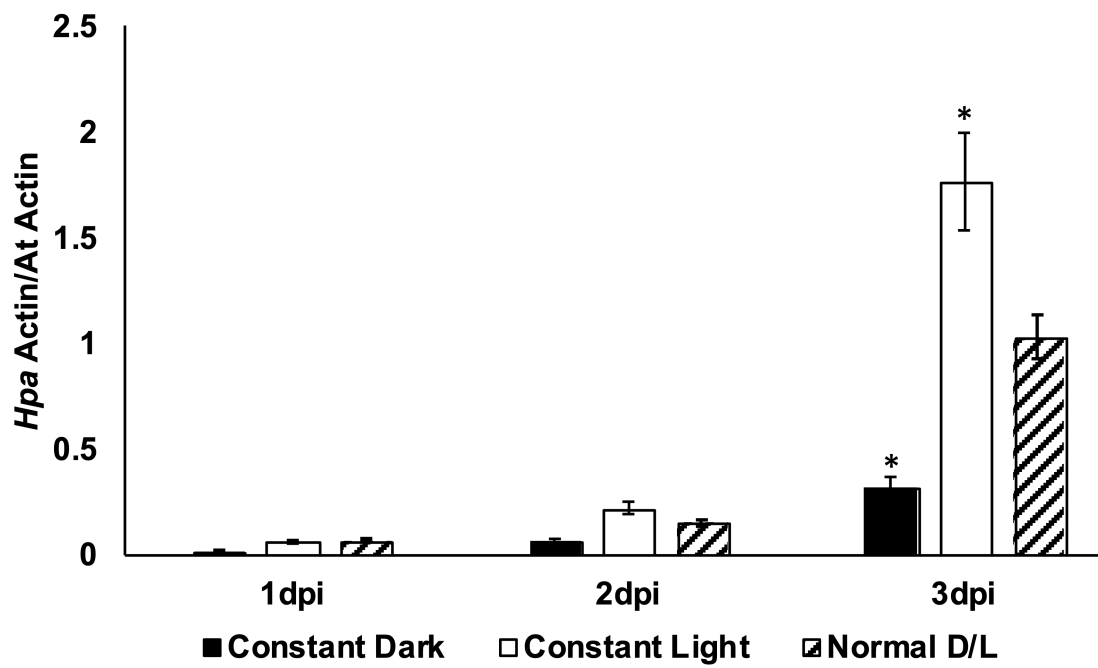

Figure 4

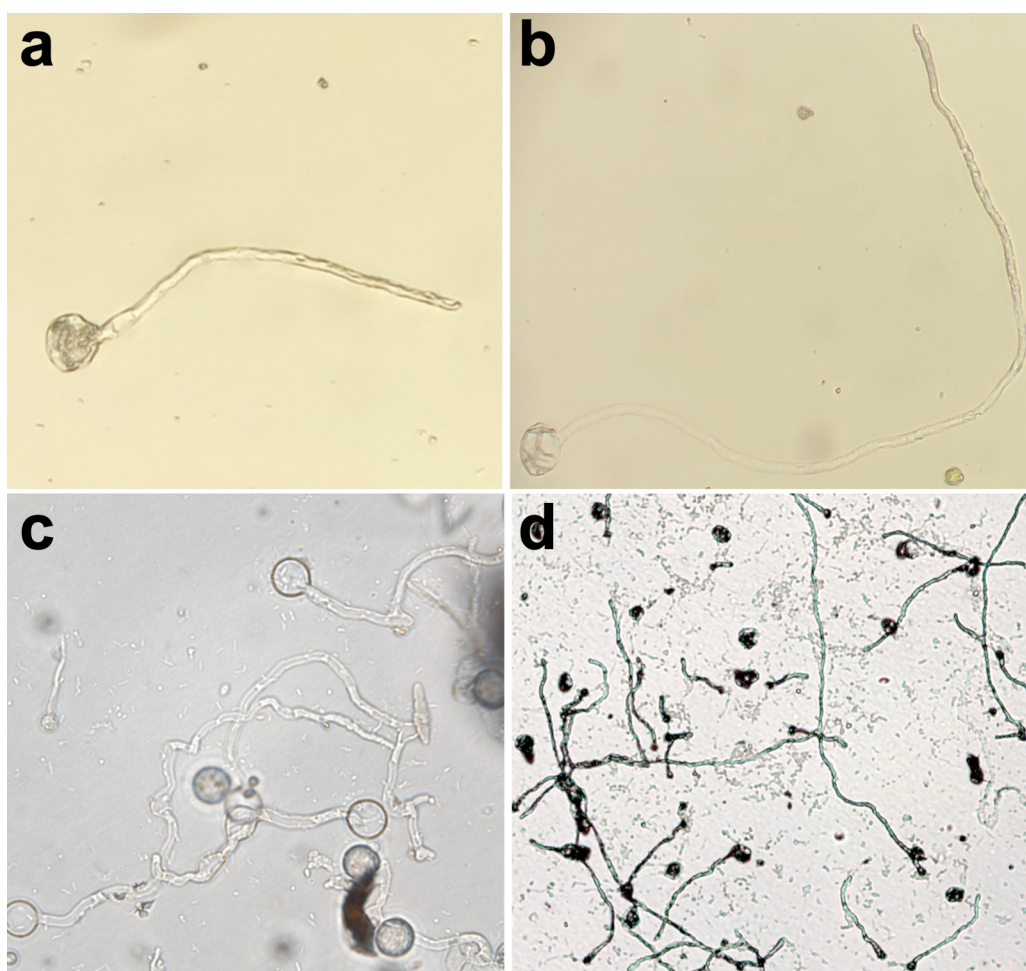

Figure 5

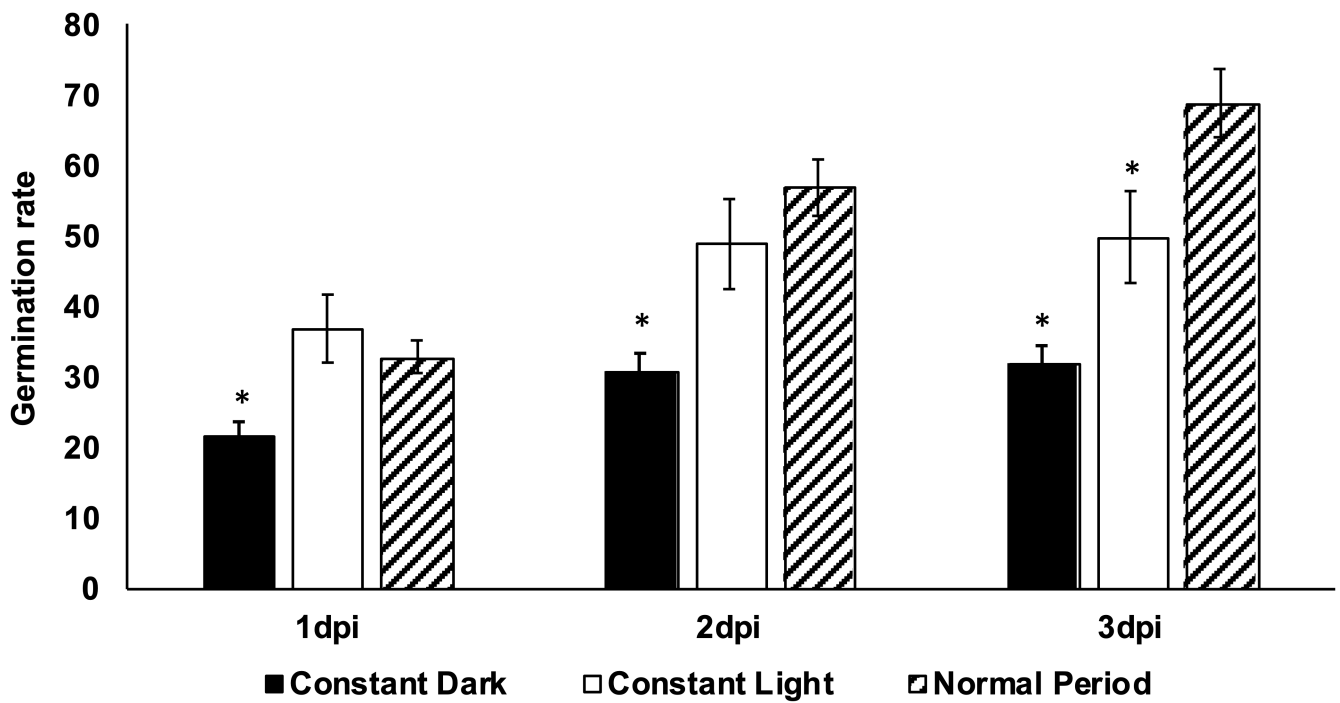

Figure 6

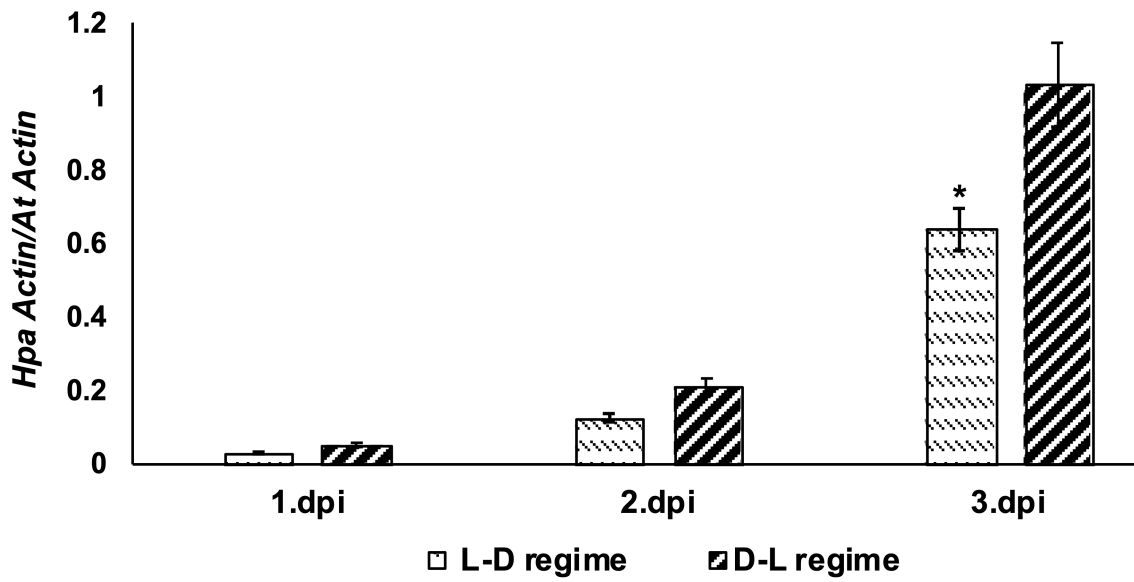

Figure 7



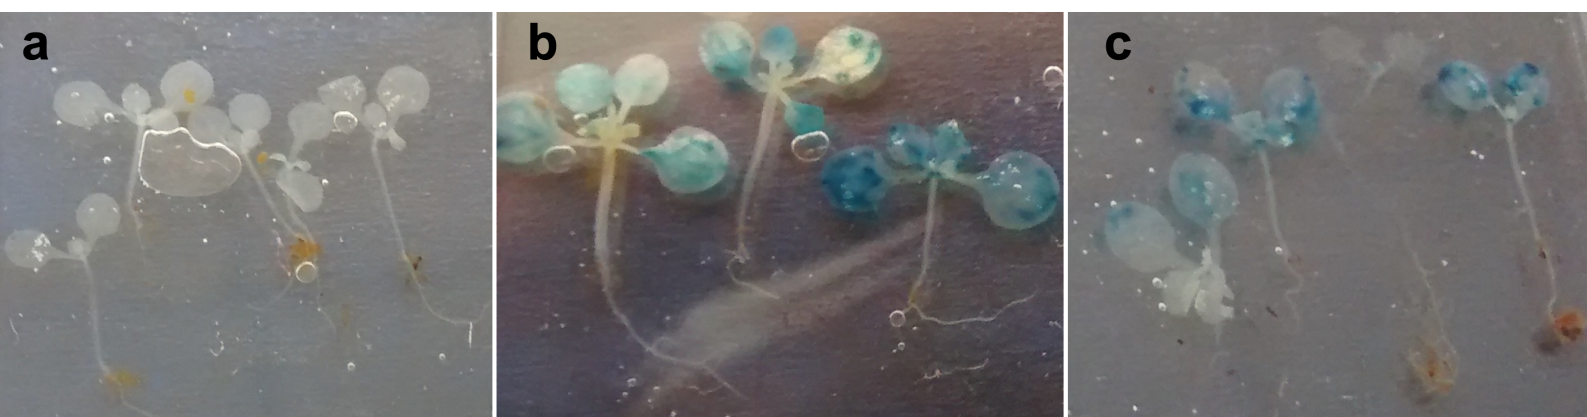

Figure 8
